# Supplementary material
Source: publisher figshare collection journal article supplement (https://plos.figshare.com/articles/dataset/_/4270577)

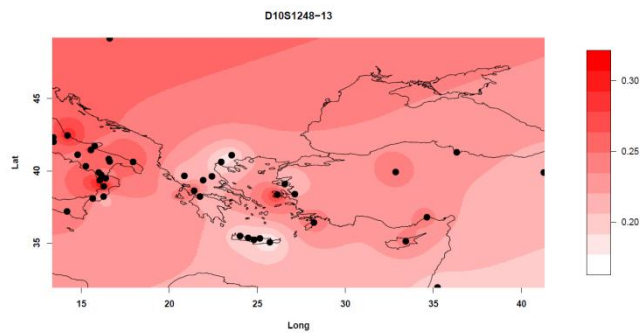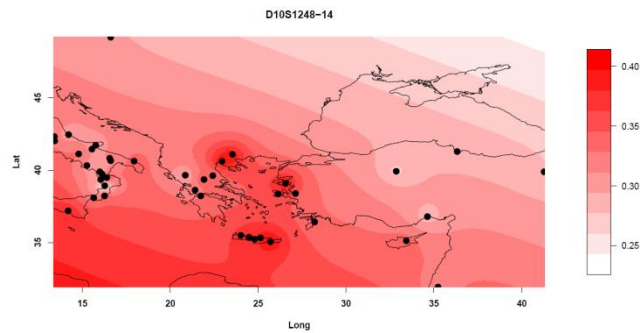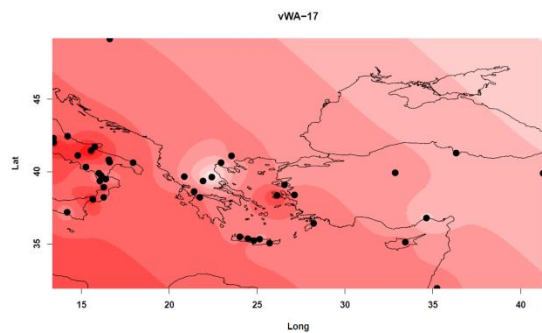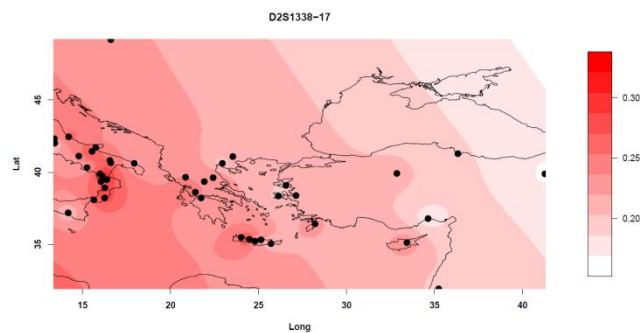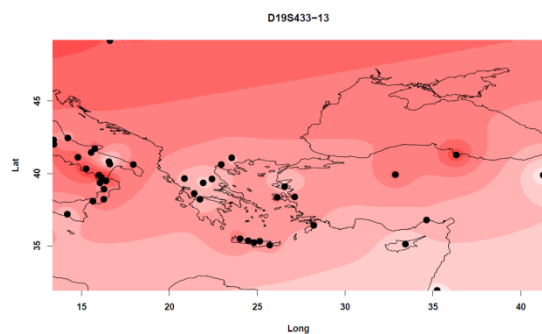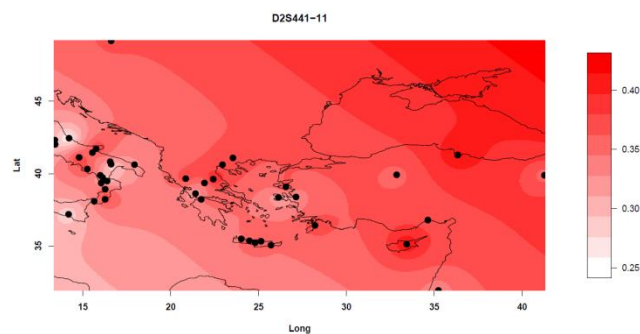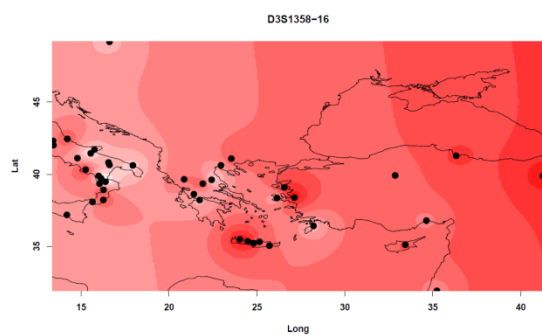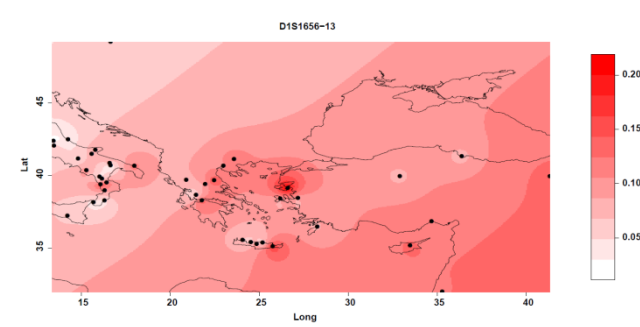

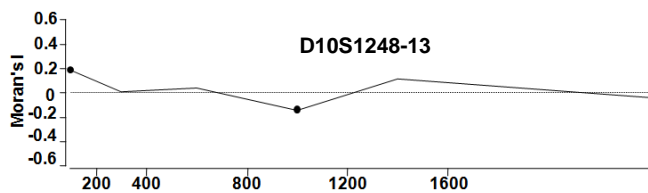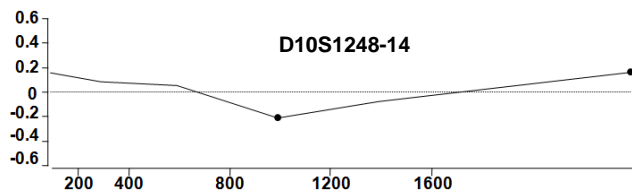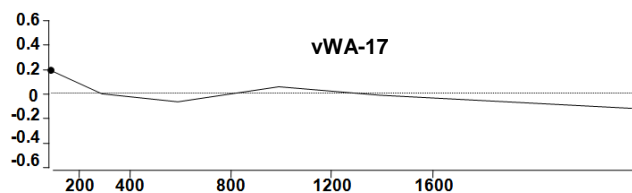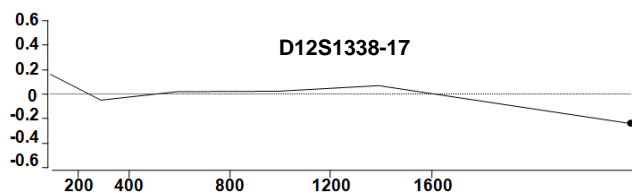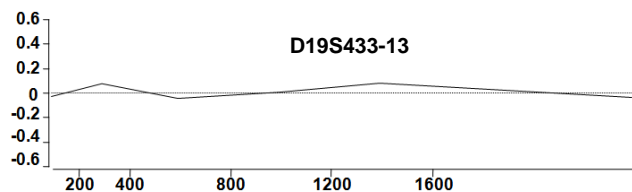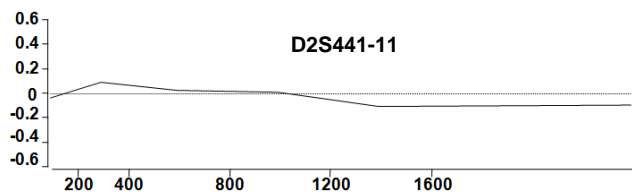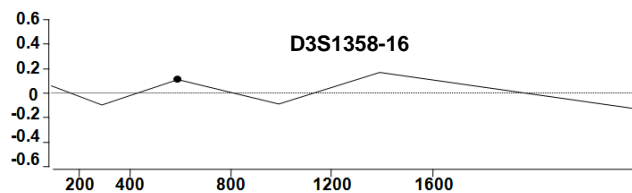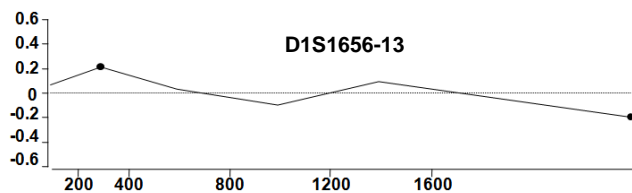

D16S539-12

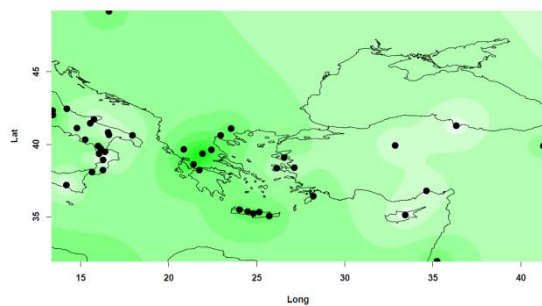

D2S1338-24

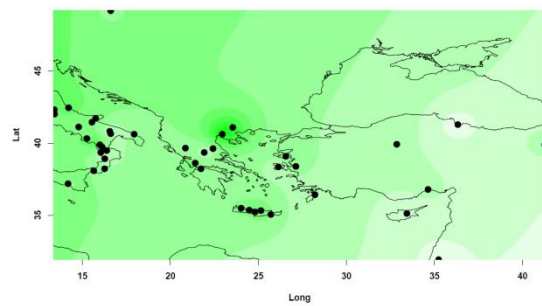

D18S51-15

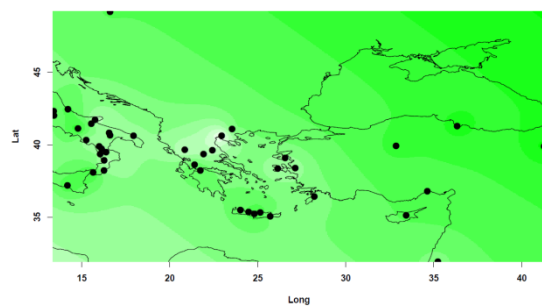

D18S51-19

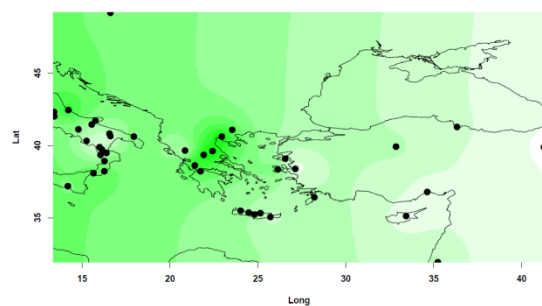

D22S1045-15

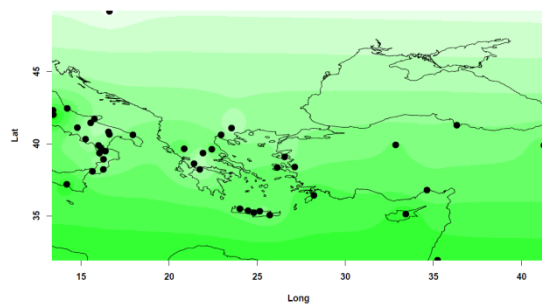

D22S1045-16

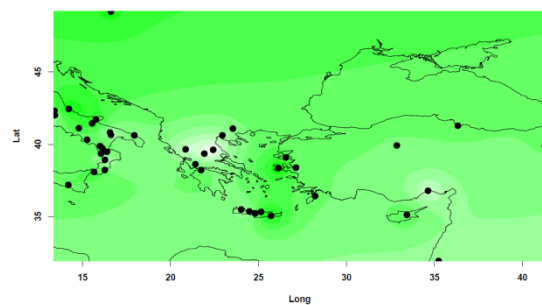

TH01-9

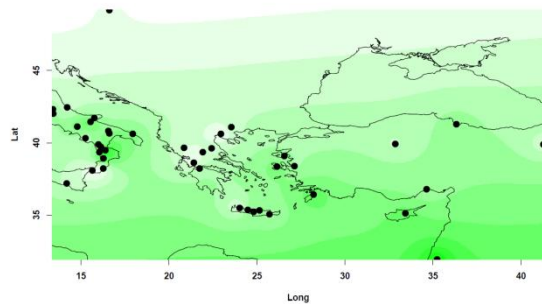

D3S1358-18

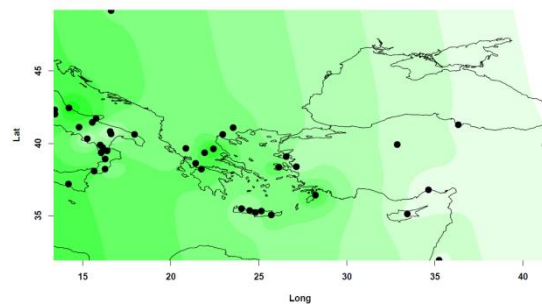

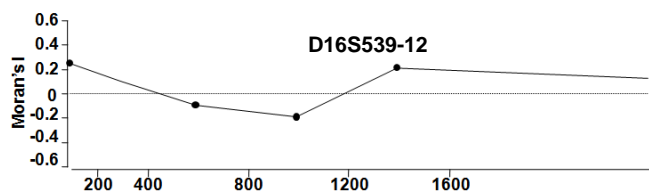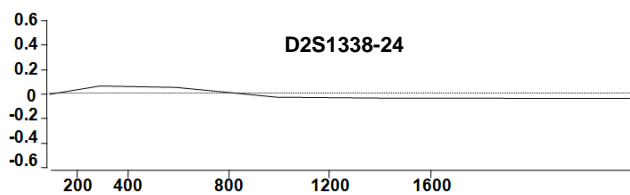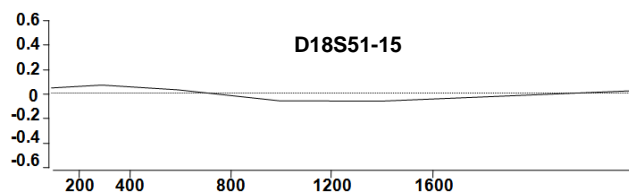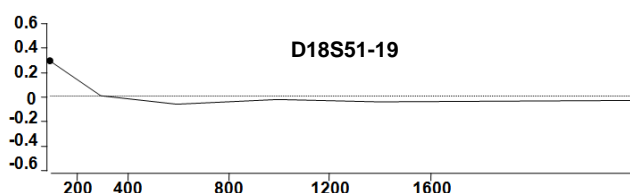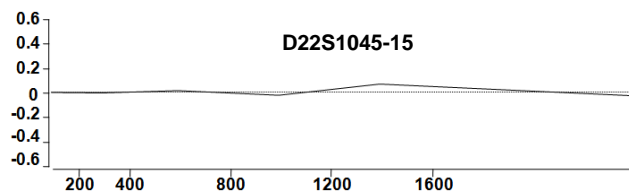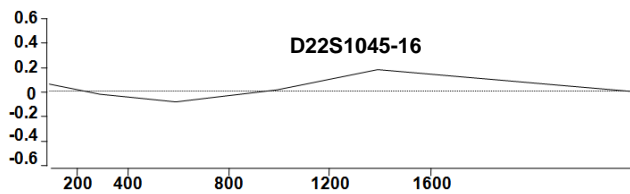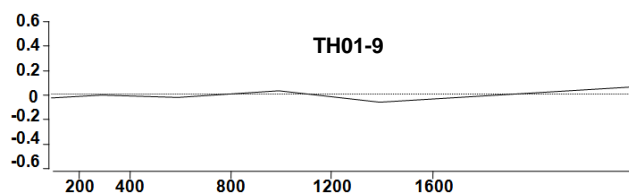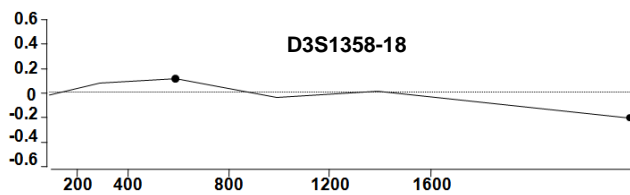

Supplement: Supplementary file [file 1]
